# Supplementary material for: Integrative Literature Analysis of Holopelagic Sargassum (Sargasso) in the Western Atlantic (2011–2022): Status, Trends, and Gaps
Source: MDPI journal article supplement (doi:10.3390/phycology3040030), 2023-10-09
Supplement: s1 [file s1]

## Supplementary material

### List Of Publications Used in Literature Analysis

- Alvarado Flores, J. J., Alcaraz Vera, J. V., Ávalos Rodríguez, M. L., Rutiaga Quiñones, J. G., Valencia, J. E., Guevara Martínez, S. J., ... Zarraga, R. A. (2022). Kinetic, thermodynamic, FT-IR, and primary constitution analysis of *Sargassum* spp from Mexico: Potential for hydrogen generation. *International Journal of Hydrogen Energy*, 47(70), 30107–30127. <https://doi.org/10.1016/j.ijhydene.2022.05.051>
- Alvarez-Galvan, Y., Minofar, B., Futera, Z., Francoeur, M., Jean-Marius, C., Brehm, N., Gaspard, S. (2022). Adsorption of Hexavalent Chromium Using Activated Carbon Produced from *Sargassum* spp.: Comparison between Lab Experiments and Molecular Dynamics Simulations. *Molecules*, 27(18), 6040. <https://doi.org/10.3390/molecules27186040>
- Alvarez-Zeferino, J. C., Ojeda-Benítez, S., Cruz-Salas, A. A., Martínez-Salvador, C., & Vázquez-Morillas, A. (2020). Microplastics in Mexican beaches. *Resources, Conservation and Recycling*, 155, 104633. <https://doi.org/10.1016/j.resconrec.2019.104633>
- Andrade-Canto, F., Beron-Vera, F. J., Goni, G. J., Karrasch, D., Olascoaga, M. J., & Triñanes, J. (2022). Carriers of *Sargassum* and mechanism for coastal inundation in the Caribbean Sea. *Physics of Fluids*, 34(1), 016602. <https://doi.org/10.1063/5.0079055>
- Antonio-Martínez, F., Henaut, Y., Vega-Zepeda, A., Cerón-Flores, A. I., Raigoza-Figueras, R., Cetz-Navarro, N. P., & Espinoza-Avalos, J. (2020). Leachate effects of pelagic *Sargassum* spp. on larval swimming behavior of the coral *Acropora palmata*. *Scientific Reports*, 10(1). <https://doi.org/10.1038/s41598-020-60864-z>
- Aparicio, E., Rodríguez-Jasso, R. M., Pinales-Márquez, C. D., Loredó-Treviño, A., Robledo-Olivo, A., Aguilar, C. N., Ruiz, H. A. (2021). High-pressure technology for *Sargassum* spp biomass pretreatment and fractionation in the third generation of bioethanol production. *Bioresource Technology*, 329, 124935. <https://doi.org/10.1016/j.biortech.2021.124935>
- Aquino, R., Noriega, C., Mascarenhas, A., Costa, M., Monteiro, S., Santana, L., Silva, I., Prestes, Y., Araujo, M., & Rollnic, M. (2022). Possible Amazonian contribution to *Sargassum* enhancement on the Amazon Continental Shelf. *Science of the Total Environment*, 853, 158432. <https://doi.org/10.1016/j.scitotenv.2022.158432>
- Arellano-Verdejo, J., Colegio De La, E., Sur, F., & Lazcano-Hernandez, H. (2020). Crowdsourcing for *Sargassum* Monitoring Along the Beaches in Quintana Roo moveON View project Ecohydrology field site in eastern Yucatan Península for process-scaling studies View project Crowdsourcing for *Sargassum* Monitoring Along the Beaches in Quintana Roo. [https://doi.org/10.1007/978-3-030-59872-3\\_4](https://doi.org/10.1007/978-3-030-59872-3_4)

- Arellano-Verdejo, J., & Lazcano-Hernández, H. E. (2021). Collective view: mapping Sargassum distribution along beaches. *PeerJ Computer Science*, 7, e528. <https://doi.org/10.7717/peerj-cs.528>
- Arellano-Verdejo, J., Lazcano-Hernandez, H. E., & Cabanillas-Terán, N. (2019). ERISNet: deep neural network for Sargassum detection along the coastline of the Mexican Caribbean. *PeerJ*, 7, e6842. <https://doi.org/10.7717/peerj.6842>
- Arellano-Verdejo, J., Santos-Romero, M., & Lazcano-Hernandez, H. E. (2022). Use of semantic segmentation for mapping Sargassum on beaches. *PeerJ*, 10, e13537. <https://doi.org/10.7717/peerj.13537>
- Ávalos-Betancourt, C. A., López-Sosa, L. B., Morales-Máximo, M., Aguilera-Mandujano, A., Corral-Huacuz, J. C., & Rodríguez-Martínez, R. E. (2021). IOP Conference Series: Earth and Environmental Science. IOP Publishing. <https://doi.org/10.1088/1755-1315/912/1/012010>
- Ayala-Mercado, I. D., Weber, B., & Durán-García, M. D. (2022). Use of Hydrothermal Pretreatment to Enhance Biogas Production from Pelagic Sargassum. *BioEnergy Research*, 15(3), 1639–1648. <https://doi.org/10.1007/s12155-021-10371-4>
- Bach, L. T., Tamsitt, V., Gower, J., Hurd, C. L., Raven, J. A., & Boyd, P. W. (2021). Testing the climate intervention potential of ocean afforestation using the Great Atlantic Sargassum Belt. *Nature Communications*, 12(1), 2556. <https://doi.org/10.1038/s41467-021-22837-2>
- Bam, W., Swarzenski, P. W., Maiti, K., Vassileva, E., Orani, A. M., Blinova, O., ... Webber, M. (2022). Scavenging of select radionuclides and trace elements by pelagic Sargassum in the Caribbean Sea. *Marine Pollution Bulletin*, 179, 113658. <https://doi.org/10.1016/j.marpolbul.2022.113658>
- Berline, L., Ody, A., Jouanno, J., Chevalier, C., André, J.-M., Thibaut, T., & Ménard, F. (2020). Hindcasting the 2017 dispersal of Sargassum algae in the Tropical North Atlantic. *Marine Pollution Bulletin*, 158, 111431. <https://doi.org/10.1016/j.marpolbul.2020.111431>
- Bernard, D., Biabiany, E., Cécé, R., Chery, R., & Sekkat, N. (2022). Clustering analysis of the Sargassum transport process: application to beaching prediction in the Lesser Antilles. *Ocean Science*, 18(4), 915–935. <https://doi.org/10.5194/os-18-915-2022>
- Beron-Vera, F. J., & Miron, P. (2020). A minimal Maxey–Riley model for the drift of Sargassum rafts. *Journal of Fluid Mechanics*, 904. <https://doi.org/10.1017/jfm.2020.666>
- Bertola, L. D., Boehm, J. T., Putman, N. F., Xue, A. T., Robinson, J., Harris, S. J., Baldwin, C. C., Overcast, I., & Hickerson, M. J. (2020). Asymmetrical gene flow in five co-distributed syngnathids explained by ocean currents and rafting propensity. *Proceedings of the Royal Society B: Biological Sciences*, 287(1926), 20200657–20200657. <https://doi.org/10.1098/rspb.2020.0657>
- Bock, M., Robinson, H., Wenning, R., French-McCay, D., Rowe, J., & Walker, A. H. (2018). Comparative risk assessment of oil spill response options for a deepwater oil

- well blowout: Part II. Relative risk methodology. *Marine Pollution Bulletin*, 133, 984–1000. <https://doi.org/10.1016/j.marpolbul.2018.05.032>
- Bonilla Loaiza, A. M., Rodríguez-Jasso, R. M., Belmares, R., López-Badillo, C. M., Araújo, R. G., Aguilar, C. N., ... Ruiz, H. A. (2022). Fungal Proteins from *Sargassum* spp. Using Solid-State Fermentation as a Green Bioprocess Strategy. *Molecules*, 27(12), 3887. <https://doi.org/10.3390/molecules27123887>
- Boggild, A. K., & Wilson, M. E. (2019). What every travel medicine practitioner needs to know about *Sargassum* weed: five key points. *Journal of Travel Medicine*, 26(7). <https://doi.org/10.1093/jtm/taz048>
- Boisnoir, A., Pascal, P.-Y., Cordonnier, S., & Lemée, R. (2019). Spatio-temporal dynamics and biotic substrate preferences of benthic dinoflagellates in the Lesser Antilles, Caribbean sea. *Harmful Algae*, 81, 18–29. <https://doi.org/10.1016/j.hal.2018.11.012>
- Brooks, M., Coles, V., Hood, R., & Gower, J. (2018). Factors controlling the seasonal distribution of pelagic *Sargassum*. *Marine Ecology Progress Series*, 599, 1–18. <https://doi.org/10.3354/meps12646>
- Brooks, M. T., Coles, V. J., & Coles, W. C. (2019). Inertia Influences Pelagic *Sargassum* Advection and Distribution. *Geophysical Research Letters*, 46(5), 2610–2618. <https://doi.org/10.1029/2018gl081489>
- Caamal-Fuentes, E., Chale-Dzul, J., Moo-Puc, R., Freile-Pelegrin, Y., & Robledo, D. (2013). Bioprospecting of brown seaweed (Ochrophyta) from the Yucatan Peninsula: cytotoxic, antiproliferative, and antiprotozoal activities. *Journal of Applied Phycology*, 26(2), 1009–1017. <https://doi.org/10.1007/s10811-013-0129-x>
- Cabanillas-Terán, N., Hernández-Arana, H. A., Ruiz-Zárate, M.-Á., Vega-Zepeda, A., & Sanchez-Gonzalez, A. (2019). *Sargassum* blooms in the Caribbean alter the trophic structure of the sea urchin *Diadema antillarum*. *PeerJ*, 7, e7589. <https://doi.org/10.7717/peerj.7589>
- Cabrera, R., Díaz-Larrea, J., Areces, A., Nuñez-García, L., Ricardo Cruz-Aviña, J., & Radulovich, R. (2021). Registro de arribazón inusual de *Sargassum* (Phaeophyceae) para la costa Atlántica de Costa Rica Unusual drift of *Sargassum* (Phaeophyceae) for the Atlantic coast of Costa Rica. *HIDROBIOLÓGICA*, 31(1). <https://doi.org/10.24275/uam/izt/dcbs/hidro/2021v31n1/>
- Calder, D.R. (2013). Some shallow-water hydroids (Cnidaria: Hydrozoa) from the central east coast of Florida, USA. *Zootaxa*, 3648(1), p.1. DOI: <https://doi.org/10.11646/zootaxa.3648.1.1>.
- Casas-Beltrán, D.A., Gallaher, C.M., Hernandez Yac, E., Febles Moreno, K., Voglesonger, K., Leal-Bautista, R.M. and Lenczewski, M. (2020). Seaweed Invasion! Temporal Changes in Beach Conditions Lead to Increasing Cenote Usage and Contamination in the Riviera Maya. *Sustainability*, 12(6), p.2474. DOI: <https://doi.org/10.3390/su12062474>.
- Castañeda-Serna, H.U., Calderón-Domínguez, G., García-Bórquez, A., Salgado-Cruz, M. de la P. and Farrera Rebollo, R.R. (2022). Structural and luminescent properties of CQDs

produced by microwave and conventional hydrothermal methods using pelagic Sargassum as carbon source. *Optical Materials*, 126, p.112156. DOI: <https://doi.org/10.1016/j.optmat.2022.112156>.

- Chale-Dzul, J., Freile-Pelegrín, Y., Robledo, D., & Moo-Puc, R. (2017). Protective effect of fucoidans from tropical seaweeds against oxidative stress in HepG2 cells. *Journal of Applied Phycology*, 29(5), 2229–2238. <https://doi.org/10.1007/s10811-017-1194-3>
- Chale-Dzul, J., Pérez-Cabeza de Vaca, R., Quintal-Novelo, C., Olivera-Castillo, L., & Moo-Puc, R. (2020). Hepatoprotective effect of a fucoidan extract from *Sargassum fluitans* Borgesen against CCl<sub>4</sub>-induced toxicity in rats. *International Journal of Biological Macromolecules*, 145, 500–509. <https://doi.org/10.1016/j.ijbiomac.2019.12.183>
- Chávez-Guerrero, L., Toxqui-Terán, A., Rivera-Haro, J. A., Lozoya-Márquez, L. A., & Lara-Banda, M. (2021). Management of Pelagic Sargassum spp. Landings to Atlantic Coastlines Through Direct Combustion and Further Synthesis of Highly Pure Calcium Carbonate Using the Residual Ashes. *Waste and Biomass Valorization*, 12(12), 6591–6599. <https://doi.org/10.1007/s12649-021-01469-z>
- Chávez-Guerrero, L., Toxqui-Terán, A., & Pérez-Camacho, O. (2021). One-pot isolation of nanocellulose using pelagic Sargassum spp. from the Caribbean coastline. *Journal of Applied Phycology*, 34(1), 637–645. <https://doi.org/10.1007/s10811-021-02643-5>
- Chikani-Cabrera, K. D., Fernandes, P. M. B., Tapia-Tussell, R., Parra-Ortiz, D. L., Hernández- Zárte, G., Valdez-Ojeda, R., & Alzate-Gaviria, L. (2022). Improvement in Methane Production from Pelagic Sargassum Using Combined Pretreatments. *Life*, 12(8), 1214. <https://doi.org/10.3390/life12081214>
- Ciappa, A. C. (2021). Marine plastic litter detection offshore Hawai'i by Sentinel-2. *Marine Pollution Bulletin*, 168, 112457. <https://doi.org/10.1016/j.marpolbul.2021.112457>
- Cipolloni, O.-A., Gigault, J., Dassié, É. P., Baudrimont, M., Gourves, P.-Y., Amaral-Zettler, L., & Pascal, P.-Y. (2022). Metals and metalloids concentrations in three genotypes of pelagic Sargassum from the Atlantic Ocean Basin-scale. *Marine Pollution Bulletin*, 178, 113564. <https://doi.org/10.1016/j.marpolbul.2022.113564>
- Cornic, M., & Rooker, J. R. (2018). Influence of oceanographic conditions on the distribution and abundance of blackfin tuna (*Thunnus atlanticus*) larvae in the Gulf of Mexico. *Fisheries Research*, 201, 1–10. <https://doi.org/10.1016/j.fishres.2017.12.015>
- Cottrell, B. A., Gonsior, M., Timko, S. A., Simpson, A. J., Cooper, W. J., & van der Veer, W. (2014). Photochemistry of marine and fresh waters: A role for copper–dissolved organic matter ligands. *Marine Chemistry*, 162, 77–88. <https://doi.org/10.1016/j.marchem.2014.03.005>
- Courtene-Jones, W., Maddalene, T., James, M. K., Smith, N. S., Youngblood, K., Jambeck, J. R., ... Thompson, R. C. (2021). Source, sea and sink—A holistic approach to understanding plastic pollution in the Southern Caribbean. *Science of the Total Environment*, 797, 149098. <https://doi.org/10.1016/j.scitotenv.2021.149098>

- Cruz-Rivera, E., Flores-Díaz, M., & Hawkins, A. (2015). A fish kill coincident with dense Sargassum accumulation in a tropical bay. *Bulletin of Marine Science*, 91(4), 455–456. <https://doi.org/10.5343/bms.2015.1048>
- Cuevas, E., Uribe-Martínez, A., & Liceaga-Correa, M. de los Á. (2018). A satellite remote-sensing multi-index approach to discriminate pelagic Sargassum in the waters of the Yucatan Peninsula, Mexico. *International Journal of Remote Sensing*, 39(11), 3608–3627. <https://doi.org/10.1080/01431161.2018.1447162>
- Dassié, E. P., Gourves, P.-Y., Cipolloni, O., Pascal, P.-Y., & Baudrimont, M. (2021). First assessment of Atlantic open ocean Sargassum spp. metal and metalloid concentrations. *Environmental Science and Pollution Research*, 29(12), 17606–17616. <https://doi.org/10.1007/s11356-021-17047-8>
- Davis, D., Simister, R., Campbell, S., Marston, M., Bose, S., McQueen-Mason, S. J., ... Tonon, T. (2021). Biomass composition of the golden tide pelagic seaweeds Sargassum fluitans and S. natans (morphotypes I and VIII) to inform valorisation pathways. *Science of the Total Environment*, 762, 143134. <https://doi.org/10.1016/j.scitotenv.2020.143134>
- Davranche, M., Lory, C., Juge, C. L., Blancho, F., Dia, A., Grassl, B., ... Gigault, J. (2020). Nanoplastics on the coast exposed to the North Atlantic Gyre: Evidence and traceability. *NanoImpact*, 20, 100262. <https://doi.org/10.1016/j.impact.2020.100262>
- de Lanlay, D. B., Monthieux, A., Banydeen, R., Jean-Laurent, M., Resiere, D., Drame, M., & Nevieri, R. (2022). Risk of preeclampsia among women living in coastal areas impacted by sargassum strandings on the French Caribbean island of Martinique. *Environmental Toxicology and Pharmacology*, 94, 103894. <https://doi.org/10.1016/j.etap.2022.103894>
- Descloitres, J., Minghelli, A., Steinmetz, F., Chevalier, C., Chami, M., & Berline, L. (2021). Revisited Estimation of Moderate Resolution Sargassum Fractional Coverage Using Decametric Satellite Data (S2-MSI). *Remote Sensing*, 13(24), 5106. <https://doi.org/10.3390/rs13245106>
- Devault, D. A., Modestin, E., Cottureau, V., Védie, F., Stiger-Pouvreau, V., Pierre, R., ... Dolique, F. (2021). The silent spring of Sargassum. *Environmental Science and Pollution Research*, 28(13), 15580–15583. <https://doi.org/10.1007/s11356-020-12216-7>
- Devault, D. A., Massat, F., Lambourdière, J., Maridakis, C., Dupuy, L., Péné-Annette, A., & Dolique, F. (2022). Micropollutant content of Sargassum drifted ashore: arsenic and chlordecone threat assessment and management recommendations for the Caribbean. *Environmental Science and Pollution Research*, 29(44), 66315–66334. <https://doi.org/10.1007/s11356-022-20300-3>
- Devault, D. A., Massat, F., Baylet, A., Dolique, F., & Lopez, P.-J. (2021). Arsenic and chlordecone contamination and decontamination toxicokinetics in Sargassum sp. *Environmental Science and Pollution Research*, 29(1), 6–16. <https://doi.org/10.1007/s11356-020-12127-7>

- Dibner, S., Martin, L., Thibaut, T., Aurelle, D., Blanfuné, A., Whittaker, K., ... Siuda, A. N. S. (2022). Consistent genetic divergence observed among pelagic *Sargassum* morphotypes in the western North Atlantic. *Marine Ecology*, 43(1). <https://doi.org/10.1111/maec.12691>
- Dierssen, H. M., Chlus, A., & Russell, B. (2015). Hyperspectral discrimination of floating mats of seagrass wrack and the macroalgae *Sargassum* in coastal waters of Greater Florida Bay using airborne remote sensing. *Remote Sensing of Environment*, 167, 247–258. <https://doi.org/10.1016/j.rse.2015.01.027>
- Doh, H., Lee, M. H., & Whiteside, W. S. (2020). Physicochemical characteristics of cellulose nanocrystals isolated from seaweed biomass. *Food Hydrocolloids*, 102, 105542. <https://doi.org/10.1016/j.foodhyd.2019.105542>
- Dubbs, L., Piehler, M., & Colby, J. (2015). An examination of pelagic *Sargassum* community primary productivity and nutrient cycling in the face of Gulf Stream based energy.
- Escobar, B., Pérez-Salcedo, K. Y., Alonso-Lemus, I. L., Pacheco, D., & Barbosa, R. (2017). N-doped porous carbon from *Sargassum* spp. as metal-free electrocatalysts for oxygen reduction reaction in alkaline media. *International Journal of Hydrogen Energy*, 42(51), 30274–30283. <https://doi.org/10.1016/j.ijhydene.2017.06.240>
- Farrell, E. R., Boustany, A. M., Halpin, P. N., & Hammond, D. L. (2014). Dolphinfinh (*Coryphaena hippurus*) distribution in relation to biophysical ocean conditions in the northwest Atlantic. *Fisheries Research*, 151, 177–190. <https://doi.org/10.1016/j.fishres.2013.11.014>
- Fernández, F., Boluda, C. J., Olivera, J., Guillermo, L. A., Gómez, B., Echavarría, E., & Gómez, A. M. (2017). Prospective Elemental Analysis of Algal Biomass Accumulated at the Dominican Republic Shores During 2015. *Revista Centro Azúcar*, 44.
- Frahm, J. L., & Brooks, W. R. (2021). The Use of Chemical Cues by *Sargassum* Shrimps *Latreutes fucorum* and *Leander tenuicornis* in Establishing and Maintaining a Symbiosis with the Host *Sargassum* Algae. *Diversity*, 13(7), 305. <https://doi.org/10.3390/d13070305>
- Francoeur, M., Ferino-Pérez, A., Yacou, C., Jean-Marius, C., Emmanuel, E., Chérémond, Y., ... Gaspard, S. (2021). Activated carbon synthesized from *Sargassum* (sp) for adsorption of caffeine: Understanding the adsorption mechanism using molecular modeling. *Journal of Environmental Chemical Engineering*, 9(1), 104795. <https://doi.org/10.1016/j.jece.2020.104795>
- Francoeur, M., Yacou, C., Jean-Marius, C., Chérémond, Y., Jauregui-Haza, U., & Gaspard, S. (2022). Optimization of the synthesis of activated carbon prepared from *Sargassum* (sp.) and its use for tetracycline, penicillin, caffeine and methylene blue adsorption from contaminated water. *Environmental Technology & Innovation*, 28, 102940. <https://doi.org/10.1016/j.eti.2022.102940>
- Franks, J., D. Johnson, D. Ko, G. Sanchez-Rubio, J. Hendon, and M. Lay, M. 2012. Unprecedented influx of pelagic *Sargassum* along Caribbean Island coastlines during summer. *Proceedings of the Gulf and Caribbean Fisheries Institute* 64: 6-8.

- García-Castañeda, J. L., Salazar-Cruz, B. A., Hernández-Zamora, G., Rivera-Armenta, J. L., Flores-Hernández, C. G., & Espindola-Flores, A. C. (2022). Obtaining and characterization of a composite material with SBS and sargassum particles. *MRS Advances*, 7(32), 987–990. <https://doi.org/10.1557/s43580-022-00431-y>
- Garcia-Ruiz, D., Villalobos-Sánchez, E., Alam-Escamilla, D., & Elizondo-Quiroga, D. (2022). In vitro inhibition of SARS-CoV-2 Infection by dry algae powders. *Scientific Reports*, 12(1). <https://doi.org/10.1038/s41598-022-22148-6>
- García-Sánchez, M., Graham, C., Vera, E., Escalante-Mancera, E., Álvarez-Filip, L., & van Tussenbroek, B. I. (2020). Temporal changes in the composition and biomass of beached pelagic *Sargassum* species in the Mexican Caribbean. *Aquatic Botany*, 167, 103275. <https://doi.org/10.1016/j.aquabot.2020.103275>
- Gavio, B., & Mancera Pineda, J. E. (2014). Blooms of Ephemeral Green Algae in San Andres Island, International Biosphere Reserve Seaflower, Southwestern Caribbean. *Acta Biológica Colombiana*, 20(2). <https://doi.org/10.15446/abc.v20n2.46062>
- Gavio, B., & Santos-Martinez, A. (2018). Floating *Sargassum* in Serranilla Bank, Caribbean Colombia, may jeopardize the race to the ocean of baby sea turtles. *Acta Biológica Colombiana*, 23(3), 311–313. <https://doi.org/10.15446/abc.v23n3.68113>
- Glize, E., Huguet, M.-J., Lucas, M., Sutton, M., & Trédan, G. (2020, September 18). Clustering *Sargassum* Mats from Earth Observation Data. Retrieved March 7, 2023, from hal.laas.fr website: <https://hal.laas.fr/hal-02938183>
- Gobert, T., Gautier, A., Connan, S., Rouget, M.-L., Thibaut, T., Stiger-Pouvreau, V., & Waeles, M. (2022). Trace metal content from holopelagic *Sargassum* spp. sampled in the tropical North Atlantic Ocean: Emphasis on spatial variation of arsenic and phosphorus. *Chemosphere*, 308, 136186. <https://doi.org/10.1016/j.chemosphere.2022.136186>
- Godavarthi, S., Mohan Kumar, K., Vázquez Vélez, E., Hernandez-Eligio, A., Mahendhiran, M., Hernandez-Como, N., ... Martinez Gomez, L. (2017). Nitrogen doped carbon dots derived from *Sargassum fluitans* as fluorophore for DNA detection. *Journal of Photochemistry and Photobiology B: Biology*, 172, 36–41. <https://doi.org/10.1016/j.jphotobiol.2017.05.014>
- González-De Zayas, R., Rossi, S., Hernández-Fernández, L., Velázquez-Ochoa, R., Soares, M., Merino-Ibarra, M., ... Soto-Jiménez, M. F. (2020). Stable isotopes used to assess pollution impacts on coastal and marine ecosystems of Cuba and México. *Regional Studies in Marine Science*, 39, 101413. <https://doi.org/10.1016/j.rsma.2020.101413>
- González-Nieto, D., Oliveira, M. C., Núñez Resendiz, M. L., Dreckmann, K. M., Mateo-Cid, L. E., & Senties, A. (2020). Molecular assessment of the genus *Sargassum* (Fucales, Phaeophyceae) from the Mexican coasts of the Gulf of Mexico and Caribbean, with the description of *S. xochitlae* sp. nov. *Phytotaxa*, 461(4), 254–274. <https://doi.org/10.11646/phytotaxa.461.4.3>
- Goodwin, D. S., Siuda, A. N. S., & Schell, J. M. (2022). In situ observation of holopelagic *Sargassum* distribution and aggregation state across the entire North Atlantic from 2011 to 2020. *PeerJ*, 10, e14079. <https://doi.org/10.7717/peerj.14079>

- Gouvêa, L. P., Assis, J., Gurgel, C. F. D., Serrão, E. A., Silveira, T. C. L., Santos, R., ... Horta, P. A. (2020). Golden carbon of Sargassum forests revealed as an opportunity for climate change mitigation. *Science of the Total Environment*, 729, 138745. <https://doi.org/10.1016/j.scitotenv.2020.138745>
- Govindarajan, A. F., Cooney, L., Whittaker, K., Bloch, D., Burdorf, R. M., Canning, S., ... Siuda, A. N. S. (2019). The distribution and mitochondrial genotype of the hydroid *Aglaophenia latecarinata* is correlated with its pelagic Sargassum substrate type in the tropical and subtropical western Atlantic Ocean. *PeerJ*, 7, e7814. <https://doi.org/10.7717/peerj.7814>
- Gower, J. F. R., & King, S. A. (2011). Distribution of floating Sargassum in the Gulf of Mexico and the Atlantic Ocean mapped using MERIS. *International Journal of Remote Sensing*, 32(7), 1917–1929. <https://doi.org/10.1080/01431161003639660>
- Gower, J., E. Young, and S. King 2013. Satellite images suggest a new Sargassum source region in 2011. *Remote Sensing Letters* 4: 764–773.
- Gower, J., & King, S. (2019). The distribution of pelagic Sargassum observed with OLCI. *International Journal of Remote Sensing*, 41(15), 5669–5679. <https://doi.org/10.1080/01431161.2019.1658240>
- Gower, J., & King, S. (2019). Seaweed, seaweed everywhere. *Science*, 365(6448), 27–27. <https://doi.org/10.1126/science.aay0989>
- Gutiérrez, R., Núñez, R., Quintana, L., Valdés, O., González, K., Rodríguez, M., ... Ortiz, E. (2017). Optimization of the extraction process of phenolic compounds from the brown algae *Sargassum fluitans* Børgesen (Børgesen).
- Hanel, R. (2015). Short Cruise Report RV Maria S. Merian Cruise MSM41.
- Hardy, R. F., Hu, C., Witherington, B., Lapointe, B., Meylan, A., Peebles, E., Hiram, S. (2018). Characterizing a Sea Turtle Developmental Habitat Using Landsat Observations of Surface-Pelagic Drift Communities in the Eastern Gulf of Mexico. *IEEE Journal of Selected Topics in Applied Earth Observations and Remote Sensing*, 11(10), 3646–3659. <https://doi.org/10.1109/jstars.2018.2863194>
- Hedley, J. D., Velázquez-Ochoa, R., & Enríquez, S. (2021). Seagrass Depth Distribution Mirrors Coastal Development in the Mexican Caribbean – An Automated Analysis of 800 Satellite Images. *Frontiers in Marine Science*, 8. <https://doi.org/10.3389/fmars.2021.733169>
- Hendy, I. W., Woolford, K., Vincent-Piper, A., Burt, O., Schaefer, M., Cragg, S. M., ... Ragazzola, F. (2021). Climate-driven golden tides are reshaping coastal communities in Quintana Roo, Mexico. *Climate Change Ecology*, 2, 100033. <https://doi.org/10.1016/j.ecochg.2021.100033>
- Hernandez, W. J., Morell, J. M., & Armstrong, R. A. (2020). High-Resolution Satellite Imagery to Assess Sargassum Inundation Impacts to Coastal Areas. *BioRxiv*. <https://doi.org/10.1101/2020.08.10.244004>



- Hernández, W. J., Morell, J. M., & Armstrong, R. A. (2021). Using high-resolution satellite imagery to assess the impact of Sargassum inundation on coastal areas. *Remote Sensing Letters*, 13(1), 24–34. <https://doi.org/10.1080/2150704x.2021.1981558>
- Hernandez-Bolio, G., Fagundo-Mollineda, A., Caamal-Fuentes, E., Robledo, D., & Freile-Pelegrin, Y. (2021). NMR Metabolic Profiling of Sargassum Species Under Different Stabilization/Extraction Processes 1. *Journal of Phycology*, 57. <https://doi.org/10.1111/jpy.13117>
- Herren, L. W., Walters, L. J., & Beach, K. S. (2013). Fragment production and recruitment ecology of the red alga *Laurencia poiteau* in Florida Bay, USA. *Journal of Experimental Marine Biology and Ecology*, 440(440), 192–199. <https://doi.org/10.1016/j.jembe.2013.01.001>
- Hervé, V., Lambourdière, J., René-Trouillefou, M., Devault, D. A., & Lopez, P. J. (2021). Sargassum Differentially Shapes the Microbiota Composition and Diversity at Coastal Tide Sites and Inland Storage Sites on Caribbean Islands. *Frontiers in Microbiology*, 12. <https://doi.org/10.3389/fmicb.2021.701155>
- Hillebrandt-Andrade, C. von, Blythe-Mallett, A., & Escobar-Briones, E. (2021). Co-Designing a safe ocean in the Western Tropical Atlantic within the framework of the UN Decade of Ocean Science for Sustainable Development. *Ocean and Coastal Research*, 69(suppl 1). <https://doi.org/10.1590/2675-2824069.21-027cvha>
- Hodgkins, H., Matthews, T., Morris, D., Boswell, J., Brumfield, A., & George, R. (2017). Quantifying Sargassum Boundaries on Eastern and Western Walls of the Gulf Stream Protruding Near Cape Hatteras into Sargasso Sea Bermuda/Azores.
- Hohlfeld, M., Schoenle, A., & Arndt, H. (2021). Deep-Sea Research I. *Deep-Sea Research*, 171, 103515. <https://doi.org/10.1016/j.dsr.2021.103515>
- Hu, C., Feng, L., Hardy, R. F., & Hochberg, E. J. (2015). Spectral and spatial requirements of remote measurements of pelagic Sargassum macroalgae. *Remote Sensing of Environment*, 167, 229–246. <https://doi.org/10.1016/j.rse.2015.05.022>
- Hu, C., B. Murch, B. Barnes, M. Wang, J.P. Maréchal, J. Franks, B. Lapointe, D. Goodwin, J. Schell and A.N.S. Suida. 2016. Sargassum watch warns of incoming seaweed. *Eos Transactions American Geophysical Union* 97. <https://doi.org/10.1029/2016EO058355>
- Hu, C. (2016, September 6). Sargassum Watch Warns of Incoming Seaweed - Eos. Retrieved June 12, 2019, from Eos website: <https://eos.org/features/sargassum-watch-warns-of-incoming-seaweed>
- Hu, C., Wang, M., Lapointe, B. E., Brewton, R. A., & Hernandez, F. J. (2021). On the Atlantic pelagic Sargassum's role in carbon fixation and sequestration. *Science of the Total Environment*, 781, 146801. <https://doi.org/10.1016/j.scitotenv.2021.146801>
- Huffard, C.L., S. von Thun, A.D. Sherman, K. Sealey, and K.L. Smith Jr. 2014. Pelagic Sargassum community change over a 40-year period: temporal and spatial variability. *Marine Biology* 161:2735–2751. DOI 10.1007/s00227-014-2539-y
- Iporac, L. A. R., Hatt, D. C., Bally, N. K., Castro, A., Cardet, E., Mesidor, R., ... Collado-Vides, L. (2022). Community-based monitoring reveals spatiotemporal variation

- ofsargasso inundation levels and morphotype dominance across the Caribbean and South Florida. *Aquatic Botany*, 182, 103546.  
<https://doi.org/10.1016/j.aquabot.2022.103546>
- Jefferson, A. E., Allman, R. J., Pacicco, A. E., Franks, J. S., Hernandez, F. J., Albins, M. A., ... Drymon, J. M. (2019). Age and growth of gray triggerfish (*Balistes caprisкус*) from a north-central Gulf of Mexico artificial reef zone. *Bulletin of Marine Science*, 95(2), 177–195. <https://doi.org/10.5343/bms.2018.0025>
- Johns, E. M., Lumpkin, R., Putman, N. F., Smith, R. H., Muller-Karger, F. E., T. Rueda-Roa, D., ... Werner, F. E. (2020). The establishment of a pelagic *Sargassum* population in the tropical Atlantic: Biological consequences of a basin-scale long distance dispersal event. *Progress in Oceanography*, 182, 102269.  
<https://doi.org/10.1016/j.pocean.2020.102269>
- Johnson, D. R., Franks, J. S., Oxenford, H. A., & Cox, S.-A. L. (2020). Pelagic *Sargassum* Prediction and Marine Connectivity in the Tropical Atlantic. *Gulf and Caribbean Research*, 31, GCFI20–GCFI30. <https://doi.org/10.18785/gcr.3101.15>
- Jouanno, J., Benshila, R., Berline, L., Soulié, A., Radenac, M.-H., Morvan, G., ... Mallet, M. (2021). A NEMO-based model of *Sargassum* distribution in the tropical Atlantic: description of the model and sensitivity analysis (NEMO- Sarg1.0). *Geoscientific Model Development*, 14(6), 4069–4086. <https://doi.org/10.5194/gmd-14-4069-2021>
- Kedzuf, S., & Salmon, M. (2016). Do Marine Turtles Use Odors to Locate Foraging Hotspots in the Open Ocean? *Chelonian Conservation and Biology*, 15(1), 90–101.  
<https://doi.org/10.2744/ccb-1183.1>
- Lapointe, B. E., West, L. E., Sutton, T. T., & Hu, C. (2014). Ryther revisited: nutrient excretions by fishes enhance productivity of pelagic *Sargassum* in the western North Atlantic Ocean. *Journal of Experimental Marine Biology and Ecology*, 458, 46–56.  
<https://doi.org/10.1016/j.jembe.2014.05.002>
- Lapointe, B. E., et al. "Nutrient content and stoichiometry of pelagic *Sargassum* reflects increasing nitrogen availability in the Atlantic Basin." *Nature communications* 12.1 (2021): 1-10.
- León-Pérez, M. C., Armstrong, R. A., Hernández, W. J., Aguilar-Perera, A., & Thompson-Grim, J. (2020). Seagrass cover expansion off Caja de Muertos Island, Puerto Rico, as determined by long-term analysis of historical aerial and satellite images (1950–2014). *Ecological Indicators*, 117, 106561.  
<https://doi.org/10.1016/j.ecolind.2020.106561>
- Lopez, P. J., Hervé, V., Lambourdière, J., René-Trouillefou, M., & Devault, D. (2020). From the Sea to the Land: Dynamic of the *Sargassum* Tide Holobiont in the Caribbean Islands. <https://doi.org/10.21203/rs.3.rs-33861/v1>
- López-Aguilar, H., Kennedy-Puentes, G., Gómez, J. A., Huerta-Reynoso, E. A., Peralta-Pérez, M. del R., Zavala-Díaz de la Serna, F. J., & Pérez-Hernández, A. (2021). Practical and Theoretical Modeling of Anaerobic Digestion of *Sargassum* spp. in the

- López-Fuerte, F. O., Siqueiros Beltrones, D. A., Martínez, Y. J., & Altamirano-Cerecedo, M. del C. (2022). Floristics and Biogeographical Affinity of Diatoms Attached to *Sargassum fluitans* (Børgesen) Børgesen and *Sargassum natans* (Linnaeus) Gaillon Arriving on Mexico's Caribbean Coasts. *Diversity*, 14(9), 758.  
<https://doi.org/10.3390/d14090758>
- López-Miranda, J. L., Silva, R., Molina, G. A., Esparza, R., Hernandez-Martinez, A. R., Hernández-Cardena, J., & Estévez, M. (2020). Evaluation of a Dynamic Bioremediation System for the Removal of Metal Ions and Toxic Dyes Using *Sargassum* Spp. *Journal of Marine Science and Engineering*, 8(11), 899.  
<https://doi.org/10.3390/jmse8110899>
- López-Miranda, J. L., Esparza, R., González-Reyna, M. A., España-Sánchez, B. L., Hernandez-Martinez, A. R., Silva, R., & Estévez, M. (2021). *Sargassum* Influx on the Mexican Coast: A Source for Synthesizing Silver Nanoparticles with Catalytic and Antibacterial Properties. *Applied Sciences*, 11(10), 4638.  
<https://doi.org/10.3390/app11104638>
- López-Miranda, J. L., Molina, G. A., Esparza, R., González-Reyna, M. A., Silva, R., & Estévez, M. (2021). Green Synthesis of Homogeneous Gold Nanoparticles Using *Sargassum* spp. Extracts and Their Enhanced Catalytic Activity for Organic Dyes. *Toxics*, 9(11), 280. <https://doi.org/10.3390/toxics9110280>
- López-Miranda, J. L., Molina, G. A., Esparza, R., Alexis González-Reyna, M., Silva, R., & Estévez, M. (2022). Ecofriendly and sustainable *Sargassum* spp.-based system for the removal of highly used drugs during the COVID-19 pandemic. *Arabian Journal of Chemistry*, 15(10), 104169. <https://doi.org/10.1016/j.arabjc.2022.104169>
- López-Sosa, L. B., Alvarado-Flores, J. J., Corral-Huacuz, J. C., Aguilera-Mandujano, A., Rodríguez-Martínez, R. E., Guevara-Martínez, S. J., ... Morales-Máximo, M. (2020). A Prospective Study of the Exploitation of Pelagic *Sargassum* spp. as a Solid Biofuel Energy Source. *Applied Sciences*, 10(23), 8706. <https://doi.org/10.3390/app10238706>
- López-Sosa, L. B., Morales-Máximo, M., Anastacio-Paulino, R., Custodio-Hernández, A., Corral-Huacuz, J. C., & Aguilera-Mandujano, A. (2021). Electron Microscopy Characterization of *Sargassum* Spp. from the Mexican Caribbean for Application as a Bioconstruction Material. *Microscopy and Microanalysis*, 27(S1), 3140–3143.  
<https://doi.org/10.1017/s1431927621010874>
- Lozano-Álvarez, E., Briones-Fourzán, P., Huchin-Mian, J., Segura-García, I., Ek-Huchim, J., Améndola-Pimenta, M., & Rodríguez-Canul, R. (2015). *Panulirus argus* virus 1 detected in oceanic postlarvae of Caribbean spiny lobster: implications for disease dispersal. *Diseases of Aquatic Organisms*, 117(2), 165–170.  
<https://doi.org/10.3354/dao02935>
- Luiz, O. J., Allen, A. P., Robertson, D. R., Floeter, S. R., & Madin, J. S. (2015). Seafarers or castaways: ecological traits associated with rafting dispersal in tropical reef fishes. *Journal of Biogeography*, 42(12), 2323–2333. <https://doi.org/10.1111/jbi.12574>

- Machado, C. B., Maddix, G.-M., Francis, P., Thomas, S.-L., Burton, J.-A., Langer, S., ... Tonon, T. (2022). Pelagic Sargassum events in Jamaica: Provenance, morphotype abundance, and influence of sample processing on biochemical composition of the biomass. *Science of the Total Environment*, 817, 152761. <https://doi.org/10.1016/j.scitotenv.2021.152761>
- Mansfield, K. L., Wyneken, J., Porter, W. P., & Luo, J. (2014). First satellite tracks of neonate sea turtles redefine the “lost years” oceanic niche. *Proceedings of the Royal Society B: Biological Sciences*, 281(1781), 20133039. <https://doi.org/10.1098/rspb.2013.3039>
- Maréchal, J.-P., Hellio, C., & Hu, C. (2017). A simple, fast, and reliable method to predict Sargassum washing ashore in the Lesser Antilles. *Remote Sensing Applications: Society and Environment*, 5, 54–63. <https://doi.org/10.1016/j.rsase.2017.01.001>
- Marmorino, G. O., Miller, W. D., Smith, G. B., & Bowles, J. H. (2011). Airborne imagery of a disintegrating Sargassum drift line. *Deep Sea Research Part I: Oceanographic Research Papers*, 58(3), 316–321. <https://doi.org/10.1016/j.dsr.2011.01.001>
- Marsh, R., Addo, K. A., Jayson-Quashigah, P.-N., Oxenford, H. A., Maxam, A., Anderson, R., ... Tompkins, E. L. (2021). Seasonal Predictions of Holopelagic Sargassum Across the Tropical Atlantic Accounting for Uncertainty in Drivers and Processes: The SARTRAC Ensemble Forecast System. *Frontiers in Marine Science*, 8. <https://doi.org/10.3389/fmars.2021.722524>
- Martinelli-Filho, J., Mario, L., & Morais, S. (2017). Can the invertebrate fauna associated to pelagic Sargassum landings in the Brazilian Amazon coast aid us to understand its origin and dispersion? Checklist of marine algae of Para state, Brazil View project Evolution and diversity of Ceriantharia (Cnidaria).
- Martínez-Molina, E. C., Freile-Pelegrín, Y., Ovando-Chacón, S. L., Gutiérrez-Miceli, F. A., Ruiz-Cabrera, M. Á., Grajales-Lagunes, A., ... Abud-Archila, M. (2021). Development and characterization of alginate-based edible film from Sargassum fluitans incorporated with silver nanoparticles obtained by green synthesis. *Journal of Food Measurement and Characterization*, 16(1), 126–136. <https://doi.org/10.1007/s11694-021-01156-6>
- Marx, U. C., Roles, J., & Hankamer, B. (2021). Sargassum blooms in the Atlantic Ocean – From a burden to an asset. *Algal Research*, 54, 102188. <https://doi.org/10.1016/j.algal.2021.102188>
- Maurer, A. S., Stapleton, S. P., Layman, C. A., & Burford Reiskind, M. O. (2021). The Atlantic Sargassum invasion impedes beach access for nesting sea turtles. *Climate Change Ecology*, 2, 100034. <https://doi.org/10.1016/j.ecochg.2021.100034>
- Maurer, A. S., Gross, K., & Stapleton, S. P. (2022). Beached Sargassum alters sand thermal environments: Implications for incubating sea turtle eggs. *Journal of Experimental Marine Biology and Ecology*, 546, 151650. <https://doi.org/10.1016/j.jembe.2021.151650>

- McDonald, T., Schroeder, B., Stacy, B., Wallace, B., Starceвич, L., Gorham, J., ... Witherington, B. (2017). Density and exposure of surface-pelagic juvenile sea turtles to Deepwater Horizon oil. *Endangered Species Research*, 33, 69–82. <https://doi.org/10.3354/esr00771>
- Mendez-Tejeda, R., & Rosado, J., Gladys A. (2019). Influence of climatic factors on Sargassum arrivals to the coasts of the Dominican Republic. *Journal of Oceanography and Marine Science*, 10(2), 22–32. <https://doi.org/10.5897/joms2019.0156>
- Mendoza-Becerril, M. A., Simões, N., & Genzano, G. (2018). Benthic hydroids (Cnidaria, Hydrozoa) from Alacranes Reef, Gulf of Mexico, Mexico. *Bulletin of Marine Science*, 94(1), 125–142. <https://doi.org/10.5343/bms.2017.1072>
- Mendoza-Becerril, M. A., Serviere-Zaragoza, E., Mazariegos-Villarreal, A., Rivera-Perez, C., Calder, D. R., Vázquez-Delfín, E. F., ... Robledo, D. (2020). Epibiont hydroids on beachcast Sargassum in the Mexican Caribbean. *PeerJ*, 8, e9795. <https://doi.org/10.7717/peerj.9795>
- Merle, H., Resière, D., Mesnard, C., Pierre, M., Jean-Charles, A., Béral, L., & Nevière, R. (2021). Case Report: Two Cases of Keratoconjunctivitis Tied to Sargassum Algae Emanations. *The American Journal of Tropical Medicine and Hygiene*, 104(1), 403–405. <https://doi.org/10.4269/ajtmh.20-0636>
- Merten, W., Appeldoorn, R., & Hammond, D. (2014). Movements of dolphinfish (*Coryphaena hippurus*) along the U.S. east coast as determined through mark and recapture data. *Fisheries Research*, 151, 114–121. <https://doi.org/10.1016/j.fishres.2013.10.021>
- Michotey, V., Blanfuné, A., Chevalier, C., Garel, M., Diaz, F., Berline, L., ... Thibaut, T. (2020). In situ observations and modelling revealed environmental factors favouring occurrence of *Vibrio* in microbiome of the pelagic Sargassum responsible for strandings. *Science of the Total Environment*, 748, 141216. <https://doi.org/10.1016/j.scitotenv.2020.141216>
- Milledge, J. J., Maneein, S., Arribas López, E., & Bartlett, D. (2020). Sargassum Inundations in Turks and Caicos: Methane Potential and Proximate, Ultimate, Lipid, Amino Acid, Metal and Metalloid Analyses. *Energies*, 13(6), 1523. <https://doi.org/10.3390/en13061523>
- Minghelli, A., Chevalier, C., Descloitres, J., Berline, L., Blanc, P., & Chami, M. (2021). Synergy between Low Earth Orbit (LEO)—MODIS and Geostationary Earth Orbit (GEO)—GOES Sensors for Sargassum Monitoring in the Atlantic Ocean. *Remote Sensing*, 13(8), 1444. <https://doi.org/10.3390/rs13081444>
- Modestin, E., Devault, D. A., Baylet, A., Massat, F., & Dolique, F. (2022). Arsenic in Caribbean bivalves in the context of Sargassum beachings: A new risk for seafood consumers. *Environmental Monitoring and Assessment*, 194(8). <https://doi.org/10.1007/s10661-022-10230-5>
- Mohammed, A., Rivers, A., Stuckey, David. C., & Ward, K. (2020). Alginate extraction from Sargassum seaweed in the Caribbean region: Optimization using response surface

- methodology. *Carbohydrate Polymers*, 245, 116419.  
<https://doi.org/10.1016/j.carbpol.2020.116419>
- Mohammed, C., Lalgee, L., Kistow, M., Jalsa, N., & Ward, K. (2022). On the binding affinity and thermodynamics of sodium alginate-heavy metal ion interactions for efficient adsorption. *Carbohydrate Polymer Technologies and Applications*, 3, 100203.  
<https://doi.org/10.1016/j.carpta.2022.100203>
- Mohapatra, B. R. (2017). Kinetic and thermodynamic properties of alginate lyase and cellulase co-produced by *Exiguobacterium* species Alg-S5. *International Journal of Biological Macromolecules*, 98, 103–110.  
<https://doi.org/10.1016/j.ijbiomac.2017.01.091>
- Mohapatra, B. R. (2020). Biocatalytic characteristics of chitosan nanoparticle-immobilized alginate lyase extracted from a novel *Arthrobacter* species AD-10. *Biocatalysis and Agricultural Biotechnology*, 23, 101458. <https://doi.org/10.1016/j.bcab.2019.101458>
- Mohapatra, B. R. (2022). Fermentation medium optimization, molecular modelling and docking analysis of the alginate lyase of a novel *Pseudomonas* sp. LB56 isolated from seaweed waste. *Biotechnology & Biotechnological Equipment*, 36(1), 281–291.  
<https://doi.org/10.1080/13102818.2022.2071635>
- Molina, G. A., González-Reyna, M. A., Loske, A. M., Fernández, F., Torres-Ortiz, D. A., & Estevez, M. (2022). Weak shock wave-mediated fucoxanthin extraction from *Sargassum* spp. and its electrochemical quantification. *Algal Research*, 68, 102891.  
<https://doi.org/10.1016/j.algal.2022.102891>
- Molodtsova, T. N., Galkin, S. V., Kobylansky, S. G., Simakova, U. V., Vedenin, A. A., Dobretsova, I. G., & Gebruk, A. V. (2017). First data on benthic and fish communities from the Mid-Atlantic Ridge, 16°40'–17°14'N. *Deep Sea Research Part II: Topical Studies in Oceanography*, 137, 69–77.  
<https://doi.org/10.1016/j.dsr2.2016.10.006>
- Monroy-Velázquez, L. V., Rodríguez-Martínez, R. E., van Tussenbroek, B. I., Aguiar, T., Solís-Weiss, V., & Briones-Fourzán, P. (2019). Motile macrofauna associated with pelagic *Sargassum* in a Mexican reef lagoon. *Journal of Environmental Management*, 252, 109650. <https://doi.org/10.1016/j.jenvman.2019.109650>
- Moritz, T. (2015). Fishes of a stranded *Sargassum* meadow at Punta Cana, Dominican Republic. *Bulletin of Fish Biology*, 15(1/2), 141–146.
- Moser, M. L., & Lee, D. S. (2012). Foraging over *Sargassum* by Western North Atlantic Seabirds. *The Wilson Journal of Ornithology*, 124(1), 66–72.  
<https://doi.org/10.1676/11-067.1>
- Munnelly, R. T., Reeves, D. B., Chesney, E. J., & Baltz, D. M. (2020). Spatial and Temporal Influences of Nearshore Hydrography on Fish Assemblages Associated with Energy Platforms in the Northern Gulf of Mexico. *Estuaries and Coasts*, 44(1), 269–285.  
<https://doi.org/10.1007/s12237-020-00772-7>

- Nieves-Ortiz, M. A., Appeldoorn, R., Weil, E., Ruiz, H. J., & Cruz-Motta, J. J. J. (2021). Fish assemblages associated with natural, transplanted, artificial, and accidental reefs in Puerto Rico. *Ocean & Coastal Management*, 214, 105901. <https://doi.org/10.1016/j.ocecoaman.2021.105901>
- Ody, A., Thibaut, T., Berline, L., Changeux, T., André, J. M., Chevalier, C., ... & Connan, S. (2019). From In Situ to satellite observations of pelagic Sargassum distribution and aggregation in the Tropical North Atlantic Ocean. *PloS one*, 14(9), e0222584.
- Olivier, J. A. S., Canepa, J. R. L., Zarate, D. G., Díaz, A. G., Jaramillo, D. A. F., García, H. K. O., & López, B. E. (2022). Bioenergetic valorization of Sargassum fluitans in the Mexican Caribbean: The determination of the calorific value and washing mechanism. *AIMS Energy*, 10(1), 45–63. <https://doi.org/10.3934/energy.2022003>
- Ortega-Flores, P. A., Serviere-Zaragoza, E., De Anda-Montañez, J. A., Freile-Pelegrín, Y., Robledo, D., & Méndez-Rodríguez, L. C. (2022). Trace elements in pelagic Sargassum species in the Mexican Caribbean: Identification of key variables affecting arsenic accumulation in *S. fluitans*. *Science of the Total Environment*, 806, 150657. <https://doi.org/10.1016/j.scitotenv.2021.150657>
- Pantoja Velueta, D. A., Ramírez, S. J. F., Sierra, J. M., Escobar, B., Ucán, C. A. A., & Rosas, G. (2022). Copper nanoparticles supported on biocarbon film from Sargassum spp. and its electrochemical activity in reducing CO<sub>2</sub>. *Carbon Letters*, 32(6), 1577–1592. <https://doi.org/10.1007/s42823-022-00396-w>
- Paraguay-Delgado, F., Carreño-Gallardo, C., Estrada-Guel, I., Zabala-Arceo, A., Martínez-Rodríguez, H. A., & Lardizábal-Gutierrez, D. (2020). Pelagic Sargassum spp. capture CO<sub>2</sub> and produce calcite. *Environmental Science and Pollution Research*, 27(20), 25794–25800. <https://doi.org/10.1007/s11356-020-08969-w>
- Parra Parra, A., Márquez Aguilar, P. A., Semjonova, J., Serrano Nava, M. E., & Vlasova, M. (2022). Adsorption properties of carbonized Sargassum algae. *MRS Advances*, 7(35), 1193–1198. <https://doi.org/10.1557/s43580-022-00407-y>
- Pérez-Gómez, J. A., García-Mendoza, E., Olivos-Ortiz, A., Paytan, A., Rebolledo-Vieyra, M., Delgado-Pech, B., & Almazán-Becerril, A. (2020). Indicators of nutrient enrichment in coastal ecosystems of the northern Mexican Caribbean. *Ecological Indicators*, 118, 106756. <https://doi.org/10.1016/j.ecolind.2020.106756>
- Pérez-Salcedo, K. Y., Alonso-Lemus, I. L., Quintana, P., Mena-Durán, C. J., Barbosa, R., & Escobar, B. (2019). Self-doped Sargassum spp. derived biocarbon as electrocatalysts for ORR in alkaline media. *International Journal of Hydrogen Energy*, 44(24), 12399–12408. <https://doi.org/10.1016/j.ijhydene.2018.10.073>
- Podlejski, W., Descloitres, J., Chevalier, C., Minghelli, A., Lett, C., & Berline, L. (2022). Filtering out false Sargassum detections using context features. *Frontiers in Marine Science*, 9. <https://doi.org/10.3389/fmars.2022.960939>
- Powers, S., Hernandez, F., Condon, R., Drymon, J., & Free, C. (2013). Effects of the Deepwater Horizon Oil Spill on Pelagic Sargassum Communities. *PLoS ONE*, 8(9), 74802.

- Powers, L. C., Hertkorn, N., McDonald, N., Schmitt-Kopplin, P., Del Vecchio, R., Blough, N. V., & Gonsior, M. (2019). Sargassum sp. Act as a Large Regional Source of Marine Dissolved Organic Carbon and Polyphenols. *Global Biogeochemical Cycles*, 33(11), 1423–1439. <https://doi.org/10.1029/2019gb006225>
- Powers, L. C., Del Vecchio, R., Blough, N. V., McDonald, N., Schmitt-Kopplin, P., & Gonsior, M. (2020). Optical Properties and Photochemical Transformation of the Dissolved Organic Matter Released by Sargassum. *Frontiers in Marine Science*, 7. <https://doi.org/10.3389/fmars.2020.588287>
- Prakash, D., Dicopolous, J., Roarty, H., Morel, J., Canals, M., & Evans, C. (2018). Development of Sargassum Seaweed Tracking Tools.
- Prokina, K. I., Keeling, P. J., & Tikhonenkov, D. V. (2021). Heterotrophic flagellates and centrohelid heliozoans from marine waters of Curacao, the Netherlands Antilles. *European Journal of Protistology*, 77, 125758. <https://doi.org/10.1016/j.ejop.2020.125758>
- Putman, Nathan F., & Mansfield, Katherine L. (2015). Direct Evidence of Swimming Demonstrates Active Dispersal in the Sea Turtle “Lost Years.” *Current Biology*, 25(9), 1221–1227. <https://doi.org/10.1016/j.cub.2015.03.014>
- Putman, N. F., Goni, G. J., Gramer, L. J., Hu, C., Johns, E. M., Trinanes, J., & Wang, M. (2018). Simulating transport pathways of pelagic Sargassum from the Equatorial Atlantic into the Caribbean Sea. *Progress in Oceanography*, 165, 205–214. <https://doi.org/10.1016/j.pocean.2018.06.009>
- Putman, N. F., Lumpkin, R., Olascoaga, M. J., Trinanes, J., & Goni, G. J. (2020). Improving transport predictions of pelagic Sargassum. *Journal of Experimental Marine Biology and Ecology*, 529, 151398. <https://doi.org/10.1016/j.jembe.2020.151398>
- Qi, L., Hu, C., Mikelsons, K., Wang, M., Lance, V., Sun, S., ... Van der Zande, D. (2020). In search of floating algae and other organisms in global oceans and lakes. *Remote Sensing of Environment*, 239, 111659. <https://doi.org/10.1016/j.rse.2020.111659>
- Quintal-Novelo, C., Rangel-Méndez, J., Ortiz-Tello, Á., Graniel-Sabido, M., Vaca, R. P.-C. de, & Moo-Puc, R. (2018). A Sargassum fluitans Borgesen Ethanol Extract Exhibits a Hepatoprotective Effect In Vivo in Acute and Chronic Liver Damage Models. *BioMed Research International*, 2018, 1–9. <https://doi.org/10.1155/2018/6921845>
- Radulovich, R., Umanzor, S., Cabrera, R., & Mata, R. (2015). Tropical seaweeds for human food, their cultivation and its effect on biodiversity enrichment. *Aquaculture*, 436, 40–46. <https://doi.org/10.1016/j.aquaculture.2014.10.032>
- Ranguin, R., Delannoy, M., Yacou, C., Jean-Marius, C., Feidt, C., Rychen, G., & Gaspard, S. (2021). Biochar and activated carbons preparation from invasive algae Sargassum spp. for Chlordecone availability reduction in contaminated soils. *Journal of Environmental Chemical Engineering*, 9(4), 105280. <https://doi.org/10.1016/j.jece.2021.105280>



- Resiere, D., Valentino, R., Nevrière, R., Banydeen, R., Gueye, P., Florentin, J., ... Mehdaoui, H. (2018). [Sargassum seaweed on Caribbean islands: an international public health concern]. *www.thelancet.com*, 392(22).
- Resiere, D., Mehdaoui, H., Florentin, J., Gueye, P., Lebrun, T., Blateau, A., ... Nevriere, R. (2020). Sargassum seaweed health menace in the Caribbean: clinical characteristics of a population exposed to hydrogen sulfide during the 2018 massive stranding. *Clinical Toxicology*, 59(3), 215–223. <https://doi.org/10.1080/15563650.2020.1789162>
- Rezek, R. J., Lebreton, B., Palmer, T. A., Stunz, G. W., & Beseres Pollack, J. (2018). Structural and functional similarity of epibenthic communities on standing and reefed platforms in the northwestern Gulf of Mexico. *Progress in Oceanography*, 168, 145–154. <https://doi.org/10.1016/j.pocean.2018.09.020>
- Rivera-Hernández, Y., Hernández-Eugenio, G., Balagurusamy, N., & Espinosa-Solares, T. (2022). Sargassum-pig manure co-digestion: An alternative for bioenergy production and treating a polluting coastal waste. *Renewable Energy*, 199, 1336–1344. <https://doi.org/10.1016/j.renene.2022.09.068>
- Roarty, H., Anarumo, J., Silander, M. C., & Xu, H. (2020). Integration of Additional Products into the Sargassum Seaweed Tracker. *Global Oceans 2020: Singapore – U.S. Gulf Coast*. <https://doi.org/10.1109/ieecconf38699.2020.9389286>
- Rodríguez-Martínez, R. E., Roy, P. D., Torrescano-Valle, N., Cabanillas-Terán, N., Carrillo-Domínguez, S., Collado-Vides, L., ... van Tussenbroek, B. I. (2020). Element concentrations in pelagic Sargassum along the Mexican Caribbean coast in 2018- 2019. *PeerJ*, 8, e8667. <https://doi.org/10.7717/peerj.8667>
- Rodríguez-Martínez, R. E., Quintana-Pali, G., Trujano-Rivera, K. I., Herrera, R., García-Rivas, M. del C., Ortíz, A., ... Jordán-Dahlgren, E. (2021). Sargassum landings have not compromised nesting of loggerhead and green sea turtles in the Mexican Caribbean. *Journal of Environmental Management*, 299, 113614. <https://doi.org/10.1016/j.jenvman.2021.113614>
- Rodríguez-Martínez, R. E., Jordán-Dahlgren, E., & Hu, C. (2022). Spatio-temporal variability of pelagic Sargassum landings on the northern Mexican Caribbean. *Remote Sensing Applications: Society and Environment*, 27, 100767. <https://doi.org/10.1016/j.rsase.2022.100767>
- Rodríguez-Muñoz, R., Muñoz-Castillo, A. I., Euán-Avila, J. I., Hernández-Núñez, H., Valdés-Lozano, D. S., Collí-Dulá, R. C., & Arias-González, J. E. (2021). Assessing temporal dynamics on pelagic Sargassum influx and its relationship with water quality parameters in the Mexican Caribbean. *Regional Studies in Marine Science*, 48, 102005. <https://doi.org/10.1016/j.rsma.2021.102005>
- Rooney, A. D., Selby, D., Lloyd, J. M., Roberts, D. H., Lückge, A., Sageman, B. B., & Prouty, N. G. (2016). Tracking millennial-scale Holocene glacial advance and retreat using osmium isotopes: Insights from the Greenland ice sheet. *Quaternary Science Reviews*, 138, 49–61. <https://doi.org/10.1016/j.quascirev.2016.02.021>

- Rosado-Espinosa, L. A., Freile-Pelegrín, Y., Hernández-Nuñez, E., & Robledo, D. (2020). A comparative study of Sargassum species from the Yucatan Peninsula coast: morphological and chemical characterisation. *Phycologia*, 59(3), 261–271. <https://doi.org/10.1080/00318884.2020.1738194>
- Rosas-Medellín, D., Rodríguez-Varela, F. J., & Escobar, B. (2022). Sulfur doped biocarbon obtained from Sargassum spp. for the oxygen reduction reaction. *International Journal of Hydrogen Energy*, 47(70), 30172–30177. <https://doi.org/10.1016/j.ijhydene.2022.05.166>
- Russell, B. J., & Dierssen, H. M. (2015). Use of Hyperspectral Imagery to Assess Cryptic Color Matching in Sargassum Associated Crabs. *PLOS ONE*, 10(9), e0136260. <https://doi.org/10.1371/journal.pone.0136260>
- Russell, B. J., & Dierssen, H. M. (2018). Color change in the Sargassum crab, *Portunus sayi*: response to diel illumination cycle and background albedo. *Marine Biology*, 165(2). <https://doi.org/10.1007/s00227-018-3287-1>
- Rutten, J., Arriaga, J., Montoya, L. D., Mariño-Tapia, I. J., Escalante-Mancera, E., Mendoza, E. T., ... Appendini, C. M. (2021). Beaching and Natural Removal Dynamics of Pelagic Sargassum in a Fringing-Reef Lagoon. *Journal of Geophysical Research: Oceans*, 126(11). <https://doi.org/10.1029/2021jc017636>
- Salazar-Cruz, B. A., Zapien-Castillo, S., Hernández-Zamora, G., & Rivera-Armenta, J. L. (2021). Investigation of the performance of asphalt binder modified by sargassum. *Construction and Building Materials*, 271, 121876. <https://doi.org/10.1016/j.conbuildmat.2020.121876>
- Saldarriaga-Hernandez, S., Melchor-Martínez, E. M., Carrillo-Nieves, D., Parra-Saldivar, R., & Iqbal, H. M. N. (2021). Seasonal characterization and quantification of biomolecules from sargassum collected from Mexican Caribbean coast – A preliminary study as a step forward to blue economy. *Journal of Environmental Management*, 298, 113507. <https://doi.org/10.1016/j.jenvman.2021.113507>
- Salmon, M., Mott, C., & Bresette, M. (2018). Biphase allometric growth in juvenile green turtles *Chelonia mydas*. *Endangered Species Research*, 37, 301–308. <https://doi.org/10.3354/esr00930>
- Salter, M. A., Rodríguez-Martínez, R. E., Álvarez-Filip, L., Jordán-Dahlgren, E., & Perry, C. T. (2020). Pelagic Sargassum as an emerging vector of high rate carbonate sediment import to tropical Atlantic coastlines. *Global and Planetary Change*, 195, 103332. <https://doi.org/10.1016/j.gloplacha.2020.103332>
- Sanchez-Rubio, G., Perry, H., Franks, J., & Johnson, D. (2018). Occurrence of pelagic Sargassum in waters of the U.S. Gulf of Mexico in response to weather-related hydrographic regimes associated with decadal and interannual variability in global climate. *Fishery Bulletin*, 116(1). <https://doi.org/10.7755/FB.116.1.10>
- Sariñana-Aldaco, O., Benavides-Mendoza, A., Robledo-Olivo, A., & González-Morales, S. (2022). The Biostimulant Effect of Hydroalcoholic Extracts of Sargassum spp. in

- Tomato Seedlings under Salt Stress. *Plants*, 11(22), 3180.  
<https://doi.org/10.3390/plants11223180>
- Schamberger, L., Minghelli, A., Chami, M., & Steinmetz, F. (2022). Improvement of Atmospheric Correction of Satellite Sentinel-3/OLCI Data for Oceanic Waters in Presence of Sargassum. *Remote Sensing*, 14(2), 386.  
<https://doi.org/10.3390/rs14020386>
- Schamberger, L., Minghelli, A., & Chami, M. (2022). Quantification of Underwater Sargassum Aggregations Based on a Semi-Analytical Approach Applied to Sentinel-3/OLCI (Copernicus) Data in the Tropical Atlantic Ocean. *Remote Sensing*, 14(20), 5230. <https://doi.org/10.3390/rs14205230>
- Schell, J.M., D.S. Goodwin, and A.N.S. Siuda. 2015. Recent Sargassum inundation events in the Caribbean: Shipboard observations reveal dominance of a previously rare form. *Oceanography* 28 (3):8–10. <http://dx.doi.org/10.5670/oceanog.2015.70>.
- Schiariti, J. P., & Salmon, M. (2022). Impact of Sargassum Accumulations on Loggerhead (*Caretta caretta*) Hatchling Recruitment in SE Florida, U.S.A. *Journal of Coastal Research*, 38(4). <https://doi.org/10.2112/jcoastres-d-21-00134.1>
- Schmitz, C., Ramlov, F., de Lucena, L. A. F., Uarrota, V., Batista, M. B., Sissini, M. N., ... Bonomi-Barufi, J. (2018). UVR and PAR absorbing compounds of marine brown macroalgae along a latitudinal gradient of the Brazilian coast. *Journal of Photochemistry and Photobiology B: Biology*, 178, 165–174.  
<https://doi.org/10.1016/j.jphotobiol.2017.10.029>
- Schultz Schiro, J. A., Meyer-Arendt, K. J., & Schneider, S. K. (2016). Sargassum on Santa Rosa Island, Florida: faunal use and beachgoer perception. *Journal of Coastal Conservation*, 21(1), 63–83. <https://doi.org/10.1007/s11852-016-0472-6>
- Sempera, J. A., Meier, E. J., & Waliczek, T. M. (2018). Composting as an Alternative Management Strategy for Sargassum Drifts on Coastlines. *HortTechnology*, 28(1), 80–84. <https://doi.org/10.21273/horttech03836-17>
- Seney, E. E. (2016). Diet of Kemp’s Ridley Sea Turtles Incidentally Caught on Recreational Fishing Gear in the Northwestern Gulf of Mexico. *Chelonian Conservation and Biology*, 15(1), 132–137. <https://doi.org/10.2744/ccb-1191.1>
- Shadle, S., Lestrade, O., Elmer, F., & Hernandez, F. (2019). Estimation and Comparison of Epiphyte Loading on Holopelagic Sargassum fluitans Collected in the North Atlantic Ocean and the Gulf of Mexico. *Gulf and Caribbean Research*, 30, SC42–SC46.  
<https://doi.org/10.18785/gcr.3001.16>
- Shamblin, B., Witherington, B., Hirama, S., Hardy, R., & Nairn, C. (2018). Mixed stock analyses indicate population-scale connectivity effects of active dispersal by surface-pelagic green turtles. *Marine Ecology Progress Series*, 601, 215–226.  
<https://doi.org/10.3354/meps12693>
- Shantz, A. A., Ladd, M. C., & Burkepille, D. E. (2017). Algal nitrogen and phosphorus content drive inter- and intraspecific differences in herbivore grazing on a Caribbean

- reef. *Journal of Experimental Marine Biology and Ecology*, 497, 164–171.  
<https://doi.org/10.1016/j.jembe.2017.09.020>
- Shi, J., Jiao, J., Lu, Y., Zhang, M., Mao, Z., & Liu, Y. (2018). Determining spectral groups to distinguish oil emulsions from Sargassum over the Gulf of Mexico using an airborne imaging spectrometer. *ISPRS Journal of Photogrammetry and Remote Sensing*, 146, 251–259. <https://doi.org/10.1016/j.isprsjprs.2018.09.017>
- Siegwalt, F., Jeantet, L., Lelong, P., Martin, J., Girondot, M., Bustamante, P., ... Frouin, C. (2022). Food selection and habitat use patterns of immature green turtles (*Chelonia mydas*) on Caribbean seagrass beds dominated by the alien species *Halophila stipulacea*. *Global Ecology and Conservation*, 37, e02169.  
<https://doi.org/10.1016/j.gecco.2022.e02169>
- Silburn, B., Bakir, A., Binetti, U., Russell, J., Kohler, P., Preston-Whyte, F., ... Maes, T. (2022). A baseline study of macro, meso and micro litter in the Belize River basin, from catchment to coast. *ICES Journal of Marine Science*.  
<https://doi.org/10.1093/icesjms/fsab268>
- Silva, R., Mendoza, E., Mariño-Tapia, I., Martínez, M. L., & Escalante, E. (2016). An artificial reef improves coastal protection and provides a base for coral recovery. *Journal of Coastal Research*, 75(sp1), 467–471. <https://doi.org/10.2112/si75-094.1>
- Skliris, N., Marsh, R., Appeaning Addo, K., & Oxenford, H. (2022). Physical drivers of pelagic sargassum bloom interannual variability in the Central West Atlantic over 2010– 2020. *Ocean Dynamics*, 72(6), 383–404. <https://doi.org/10.1007/s10236-022-01511-1>
- Snyder, R. A., Moss, J. A., Santoferrara, L., Head, M., & Jeffrey, W. H. (2021). Ciliate microzooplankton from the Northeastern Gulf of Mexico. *ICES Journal of Marine Science*, 78(9), 3356–3371. <https://doi.org/10.1093/icesjms/fsab002>
- Sosa-Gutierrez, R., Jouanno, J., Berline, L., Descloitres, J., & Chevalier, C. (2022). Impact of Tropical Cyclones on Pelagic Sargassum. *Geophysical Research Letters*, 49(6).  
<https://doi.org/10.1029/2021gl097484>
- Soto-Morales, S., Martínez-Rodríguez, L. I., Serviere-Zaragoza, E., Martínez-Sálcido, A. I., & Soto-Jiménez, M. F. (2022). Identification of Li as a reference element in Sargassum bioaccumulation of conservative-type elements (Mg, Mo, Sb, Cs and U). *Marine Chemistry*, 242, 104110. <https://doi.org/10.1016/j.marchem.2022.104110>
- Stephan, P., Le Roux, Y., Gaspard, S., Michaux, F., Feidt, C., Soligot, C., ... Delannoy, M. (2022). Effects of particle size and amendment rates of Sargassum biochar on chlordecone sequestration in West Indian soils. *Environmental Science and Pollution Research*, 30(3), 5873–5880. <https://doi.org/10.1007/s11356-022-21885-5>
- Stout, S. A., Litman, E., Baker, G., & Franks, J. S. (2018). Novel Biological Exposures Following the Deepwater Horizon Oil Spill Revealed by Chemical Fingerprinting. *Oil Spill Environmental Forensics Case Studies*, 757–784. <https://doi.org/10.1016/b978-0-12-804434-6.00033-1>

- Tansel, B., Lee, M., Berbakov, J., Tansel, D. Z., & Koklonis, U. (2014). Dispersion of Louisiana crude oil in salt water environment by Corexit 9500A in the presence of natural coastal materials. *Estuarine, Coastal and Shelf Science*, 143, 58–64. <https://doi.org/10.1016/j.ecss.2014.03.022>
- Tejada-Tejada, P., Rodríguez-Rodríguez, Y., Rodríguez de Francisco, L. E., Paíno-Perdomo, O., & Boluda, C. J. (2021). Lead, chromium, nickel, copper and zinc levels in *Sargassum* species reached the coasts of Dominican Republic during 2019: A preliminary evaluation for the use of algal biomass as fertilizer and animal feeding. *Tecnología Y Ciencias Del Agua*, 12(3), 124–163. <https://doi.org/10.24850/j-tyca-2021-03-04>
- Tenería, F. A. M., Labrada-Martagón, V., Herrera-Pavón, R. L., Work, T. M., González-Ballesteros, E., Negrete-Philippe, A. C., & Maldonado-Saldaña, G. (2022). Fibropapillomatosis dynamics in green sea turtles *Chelonia mydas* over 15 years of monitoring in Akumal Bay, Quintana Roo, Mexico. *Diseases of Aquatic Organisms*, 149, 133–143. <https://doi.org/10.3354/dao03669>
- Thompson, T. M., Young, B. R., & Baroutian, S. (2020). Efficiency of hydrothermal pretreatment on the anaerobic digestion of pelagic *Sargassum* for biogas and fertiliser recovery. *Fuel*, 279, 118527. <https://doi.org/10.1016/j.fuel.2020.118527>
- Thompson, T. M., Ramin, P., Udugama, I., Young, B. R., Gernaey, K. V., & Baroutian, S. (2021). Techno-economic and environmental impact assessment of biogas production and fertiliser recovery from pelagic *Sargassum*: A biorefinery concept for Barbados. *Energy Conversion and Management*, 245, 114605. <https://doi.org/10.1016/j.enconman.2021.114605>
- Torralba, M. G., Franks, J. S., Gomez, A., Yooseph, S., Nelson, K. E., & Grimes, D. J. (2016). Effect of Macondo Prospect 252 Oil on Microbiota Associated with Pelagic *Sargassum* in the Northern Gulf of Mexico. *Microbial Ecology*, 73(1), 91–100. <https://doi.org/10.1007/s00248-016-0857-y>
- Torres-Conde, E. G., & Martínez-Daranas, B. (2020). Análisis espacio-temporal y oceanográfico de las arribazones de *Sargassum* pelágico en las playas del este de la Habana, Cuba. *Aquadocs.org*, 40(1). Retrieved from <https://aquadocs.org/handle/1834/17768>
- Torres-Conde, E. G., Martínez-Daranas, B., & Prieto, L. (2021). The Havana littoral, an area of distribution for *Physalia physalis* in the Atlantic Ocean. *Regional Studies in Marine Science*, 44, 101752. <https://doi.org/10.1016/j.rsma.2021.101752>
- Torres-Conde, E. G. (2022). Is simultaneous arrival of pelagic *Sargassum* and *Physalia physalis* a new threat to the Atlantic coasts? *Estuarine, Coastal and Shelf Science*, 275, 107971. <https://doi.org/10.1016/j.ecss.2022.107971>
- Trench, C., Thomas, S.-L., Thorney, D., Maddix, G.-M., Francis, P., Small, H., ... Webber, M. (2022). Application of Stranded Pelagic *Sargassum* Biomass as Compost for Seedling Production in the Context of Mangrove Restoration. *Frontiers in Environmental Science*, 10. <https://doi.org/10.3389/fenvs.2022.932293>

- Trinanes, J., Putman, N. F., Goni, G., Hu, C., & Wang, M. (2021). Monitoring pelagic Sargassum inundation potential for coastal communities. *Journal of Operational Oceanography*, 16(1), 48–59. <https://doi.org/10.1080/1755876x.2021.1902682>
- Uribe-Martínez, A., Berriel-Bueno, D., Chávez, V., Cuevas, E., Almeida, K. L., Fontes, J. V. H., ... Silva, R. (2022). Multiscale distribution patterns of pelagic rafts of sargasso (*Sargassum* spp.) in the Mexican Caribbean (2014–2020). *Frontiers in Marine Science*, 9. <https://doi.org/10.3389/fmars.2022.920339>
- Valentini, N., & Balouin, Y. (2020). Assessment of a Smartphone-Based Camera System for Coastal Image Segmentation and Sargassum monitoring. *Journal of Marine Science and Engineering*, 8(1), 23. <https://doi.org/10.3390/jmse8010023>
- van der Plank, S., Cox, S.-A., Cumberbatch, J., Mahon, R., Thomas, B., Tompkins, E. L., & Corbett, J. (2022). Polycentric Governance, Coordination and Capacity: The Case of Sargassum Influxes in the Caribbean. *Coastal Management*, 50(4), 285–305. <https://doi.org/10.1080/08920753.2022.2078172>
- van Sebille, E., Zettler, E., Wienders, N., Amaral-Zettler, L., Elipot, S., & Lumpkin, R. (2021) Dispersion of Surface Drifters in the Tropical Atlantic. *Frontiers in Marine Science*, 7. <https://doi.org/10.3389/fmars.2020.607426>
- Vázquez-Delfín, E., Freile-Pelegrín, Y., Salazar-Garibay, A., Serviere-Zaragoza, E., Méndez-Rodríguez, L. C., & Robledo, D. (2021). Species composition and chemical characterization of Sargassum influx at six different locations along the Mexican Caribbean coast. *Science of the Total Environment*, 795, 148852. <https://doi.org/10.1016/j.scitotenv.2021.148852>
- VishnuRadhan, R., Eldho, T. I., & David, T. D. (2019). Can plastics affect near surface layer ocean processes and climate? *Marine Pollution Bulletin*, 140, 274–280. <https://doi.org/10.1016/j.marpolbul.2019.01.052>
- Waliczek, T. M., Wagner, N. C., & Guney, S. (2020). Willingness to Pay for a Specialty Blend Compost Product Developed from Brown Seaweed Harvested from Coastal Regions in Texas. *HortTechnology*, 30(3), 337–345. <https://doi.org/10.21273/horttech04511-19>
- Walsh, K. T., & Waliczek, T. M. (2020). Examining the Quality of a Compost Product Derived from Sargassum. *HortTechnology*, 30(3), 331–336. <https://doi.org/10.21273/horttech04523-19>
- Wang, M. and C. Hu. 2016. Mapping and quantifying Sargassum distribution and coverage in the central West Atlantic using MODIS observations. *Remote Sensing of Environment* 183: 350–367. <https://doi.org/10.1016/j.rse.2016.04.019>
- Wang, M., and C. Hu. 2017. Predicting Sargassum blooms in the Caribbean Sea from MODIS observations. *Geophysical Research Letters* 44: 3265–3273. <https://doi.org/10.1002/2017GL072932>

- Wang, M., C. Hu, J. Cannizzaro, D. English, X. Han, D. Naar, B. Lapointe, R. Brewton, and F. Hernandez. 2018. Remote sensing of Sargassum biomass, nutrients, and pigments. *Geophysical Research Letters* 45: 1-7. <https://doi.org/10.1029/2018GL078858>.
- Wang, M., & Hu, C. (2018). On the continuity of quantifying floating algae of the Central West Atlantic between MODIS and VIIRS. *International Journal of Remote Sensing*, 39(12), 3852–3869. <https://doi.org/10.1080/01431161.2018.1447161>
- Wang, M., & Hu, C. (2021). Automatic Extraction of Sargassum Features From Sentinel-2 MSI Images. *IEEE Transactions on Geoscience and Remote Sensing*, 59(3), 2579–2597. <https://doi.org/10.1109/tgrs.2020.3002929>
- Wang, M., & Hu, C. (2021b). Satellite remote sensing of pelagic Sargassum macroalgae: The power of high resolution and deep learning. *Remote Sensing of Environment*, 264, 112631. <https://doi.org/10.1016/j.rse.2021.112631>
- Webster, R.K. and Linton, T. (2013) Development and Implementation of Sargassum Early Advisory System (SEAS). *Shore & Beach*, 81, No. 3. [http://seas-forecast.com/Papers/Development\\_Implementation\\_of\\_SEAS.pdf](http://seas-forecast.com/Papers/Development_Implementation_of_SEAS.pdf)
- Wei, C.-L., Rowe, G. T., Nunnally, C. C., & Wicksten, M. K. (2012). Anthropogenic “Litter” and macrophyte detritus in the deep Northern Gulf of Mexico. *Marine Pollution Bulletin*, 64(5), 966–973. <https://doi.org/10.1016/j.marpolbul.2012.02.015>
- Wells, R. J. D., Rooker, J. R., Quigg, A., & Wissel, B. (2017). Influence of mesoscale oceanographic features on pelagic food webs in the Gulf of Mexico. *Marine Biology*, 164(4). <https://doi.org/10.1007/s00227-017-3122-0>
- West, L. E., & Randy Brooks, W. (2018). Host location and selection by the symbiotic sargassum crab *Portunus sayi*: the role of chemical, visual and tactile cues. *Symbiosis*, 76(2), 177–185. <https://doi.org/10.1007/s13199-018-0561-4>
- Witherington, B., Hiram, S., & Hardy, R. (2012). Young sea turtles of the pelagic Sargassum-dominated drift community: habitat use, population density, and threats. *Marine Ecology Progress Series*, 463, 1–22. <https://doi.org/10.3354/meps09970>
- Zhang, Y., & Hu, C. (2021). Ocean Temperature and Color Frontal Zones in the Gulf of Mexico: Where, When, and Why. *Journal of Geophysical Research: Oceans*, 126(10). <https://doi.org/10.1029/2021jc017544>
- Zhang, S., Hu, C., Barnes, B. B., & Harrison, T. N. (2022). Monitoring Sargassum Inundation on Beaches and Nearshore Waters Using PlanetScope/Dove Observations. *IEEE Geoscience and Remote Sensing Letters*, 19, 1–5. <https://doi.org/10.1109/lgrs.2022.3148684>
